# Supplementary material for: The REPLUMLESS Transcription Factor Controls the Expression of the RECEPTOR-LIKE CYTOPLASMIC KINASE VI_A2 Gene Involved in Shoot and Fruit Patterning of Arabidopsis thaliana
Source: Preprints.org preprint supplement (doi:10.20944/preprints202407.0524.v1), 2024-07-09
Supplement: Supplementary file 1 [file supplementary]

## Sheet: Munka1
Binding Sites (BS) in upstream region of At2g18890
For the detailed description of the binding sites visit https://agris-knowledgebase.org/AtcisDB/bindingsites.html; last accessed 18.01.2024).
BS Name	BS Genome Start	BS Genome End	Binding Site Sequence	Binding Site Family/TF
ATB2/AtbZIP53/AtbZIP44/GBF5 BS in ProDH	8189788	8189793	actcat	bZIP
ATB2/AtbZIP53/AtbZIP44/GBF5 BS in ProDH	8189363	8189368	actcat	bZIP
AtMYC2 BS in RD22	8188223	8188228	cacatg	BHLH
Bellringer/replumless/pennywise BS1 IN AG	8189001	8189008	aaattaaa	Homeobox
Bellringer/replumless/pennywise BS1 IN AG	8190282	8190289	aaattaaa	Homeobox
Bellringer/replumless/pennywise BS1 IN AG	8190048	8190055	aaattaaa	Homeobox
Bellringer/replumless/pennywise BS1 IN AG	8190202	8190209	aaattaaa	Homeobox
Bellringer/replumless/pennywise BS1 IN AG	8190938	8190945	aaattaaa	Homeobox
Bellringer/replumless/pennywise BS2 IN AG	8190299	8190306	aaattagt	Homeobox
Bellringer/replumless/pennywise BS2 IN AG	8188508	8188515	aaattagt	Homeobox
Bellringer/replumless/pennywise BS3 IN AG	8190300	8190307	actaattt	Homeobox
Bellringer/replumless/pennywise BS3 IN AG	8188507	8188514	actaattt	Homeobox
CCA1 binding site motif	8188486	8188493	aaaaatct	MYB-related
CCA1 binding site motif	8189936	8189943	aaaaatct	MYB-related
DPBF1&2 binding site motif	8188223	8188229	acacatg	bZIP
E2F-varient binding site motif	8190341	8190349	tctcccgcc	E2F-DP
GATA promoter motif [LRE]	8189331	8189336	agatag
GATA promoter motif [LRE]	8188201	8188206	agataa
GATA promoter motif [LRE]	8189067	8189072	agataa
GATA promoter motif [LRE]	8188758	8188763	agataa
GATA promoter motif [LRE]	8189991	8189996	tgataa
GATA promoter motif [LRE]	8190455	8190460	agatag
GATA promoter motif [LRE]	8190988	8190993	agataa
GATA promoter motif [LRE]	8190519	8190524	tgataa
GATA promoter motif [LRE]	8189083	8189088	tgataa
Ibox promoter motif	8189084	8189089	gataag
LFY consensus binding site motif	8189266	8189271	ccattg	LFY
LFY consensus binding site motif	8190250	8190255	ccaatg	LFY
LFY consensus binding site motif	8189230	8189235	ccaatg	LFY
MYB4 binding site motif	8190930	8190936	accaacc	MYB
MYB4 binding site motif	8190820	8190826	aacaaac	MYB
MYB4 binding site motif	8188965	8188971	aactacc	MYB
MYB4 binding site motif	8189471	8189477	acctaac	MYB
MYB binding site promoter	8190929	8190936	caccaacc	MYB
MYB binding site promoter	8189470	8189477	aacctaac	MYB
RAV1-A binding site motif	8190271	8190275	caaca	ABI3VP1
RAV1-A binding site motif	8190009	8190013	caaca	ABI3VP1
RAV1-A binding site motif	8188977	8188981	caaca	ABI3VP1
RAV1-A binding site motif	8190080	8190084	caaca	ABI3VP1
RAV1-A binding site motif	8190786	8190790	caaca	ABI3VP1
RAV1-A binding site motif	8188243	8188247	caaca	ABI3VP1
RAV1-B binding site motif	8189655	8189660	cacctg	ABI3VP1
SORLIP1	8189017	8189022	agccac
T-box promoter motif	8190965	8190970	actttg
T-box promoter motif	8189562	8189567	actttg
T-box promoter motif	8190790	8190795	actttg
W-box promoter motif	8189174	8189179	ttgacc	WRKY
W-box promoter motif	8189511	8189516	ttgact	WRKY
